# Supplementary material for: Environmental change makes robust ecological networks fragile
Source: PubMed Central journal article supplement (PMC4987532; doi:10.1038/ncomms12462), 2016-08-11
Supplement: ncomms12462-s1.pdf [file ncomms12462-s1.pdf]

## Supplementary information

### Supplementary Figures

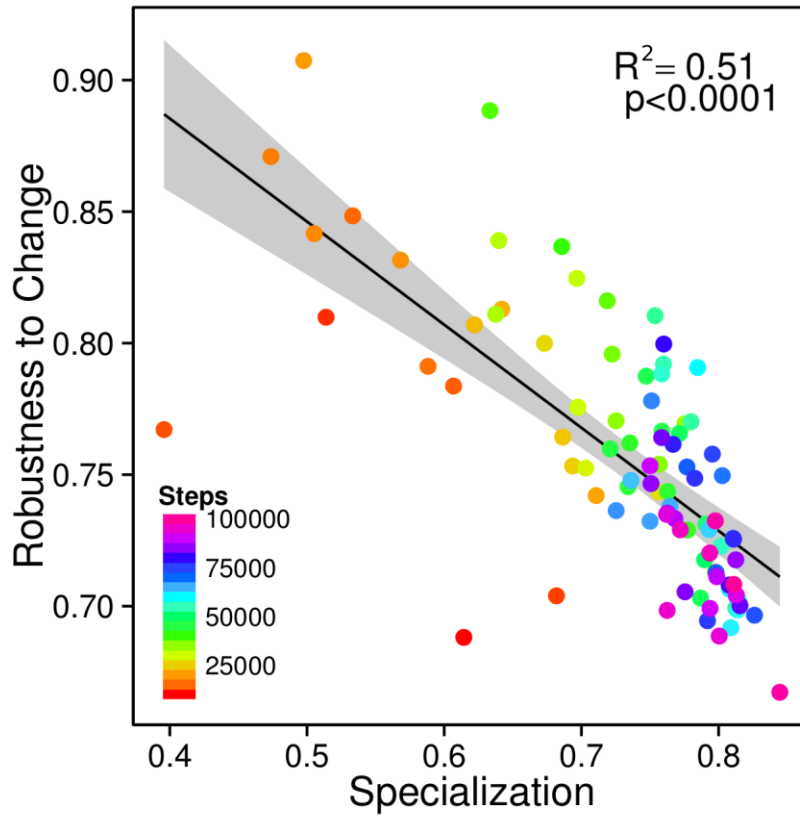

**Supplementary Figure 1 | Specialization in digital host-parasite assemblages increases over time, while robustness to novel conditions decreases.** Specialization was computed, in each digital host-parasite assemblage, as 1 minus the fraction of hosts used by all parasites.

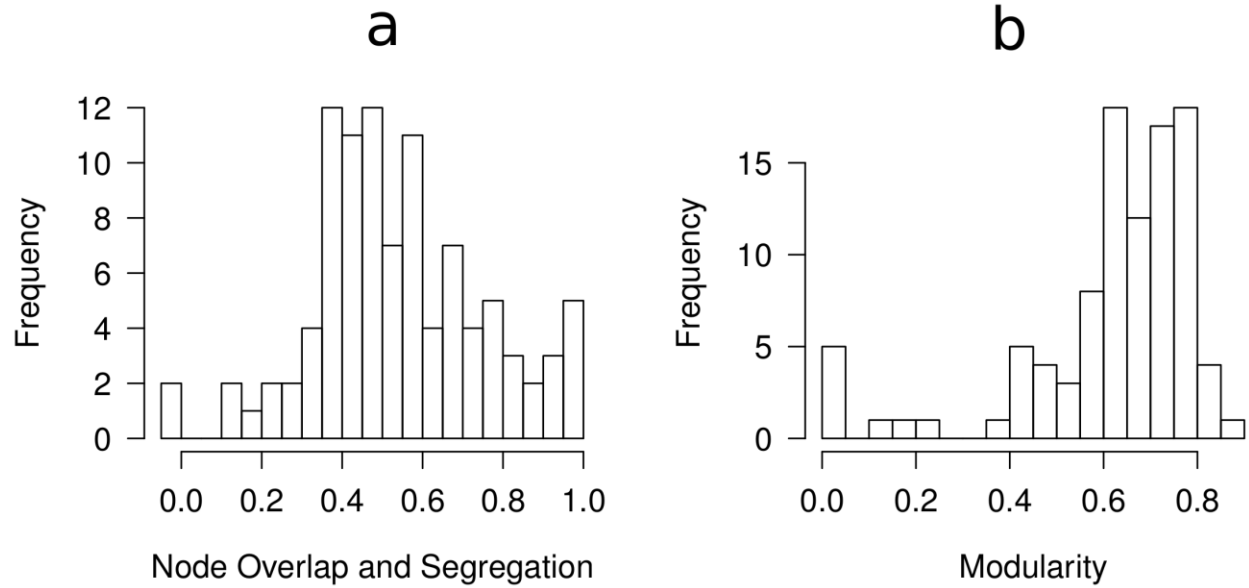

**Supplementary Figure 2 | Distributions of node overlap and segregation (nestedness) values and modularity in the 100 co-evolved host-parasite networks. (a)** Most networks tends toward randomness (0) or nestedness (1), although no network tends toward segregation (< 0). **(b)** Most networks show high modularity.

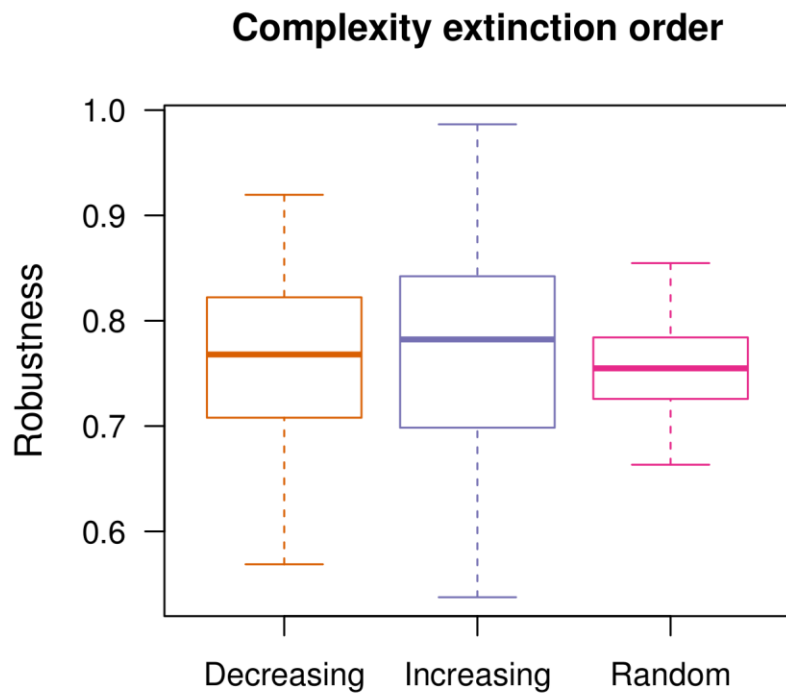

**Supplementary Figure 3 | Robustness of digital networks against the removal of hosts in decreasing, increasing and random order of complexity.** Host complexity was measured as the most complex of the host's tasks (see Methods). Boxes indicate first and third quartiles, whiskers indicate range values, and horizontal lines indicate median values.

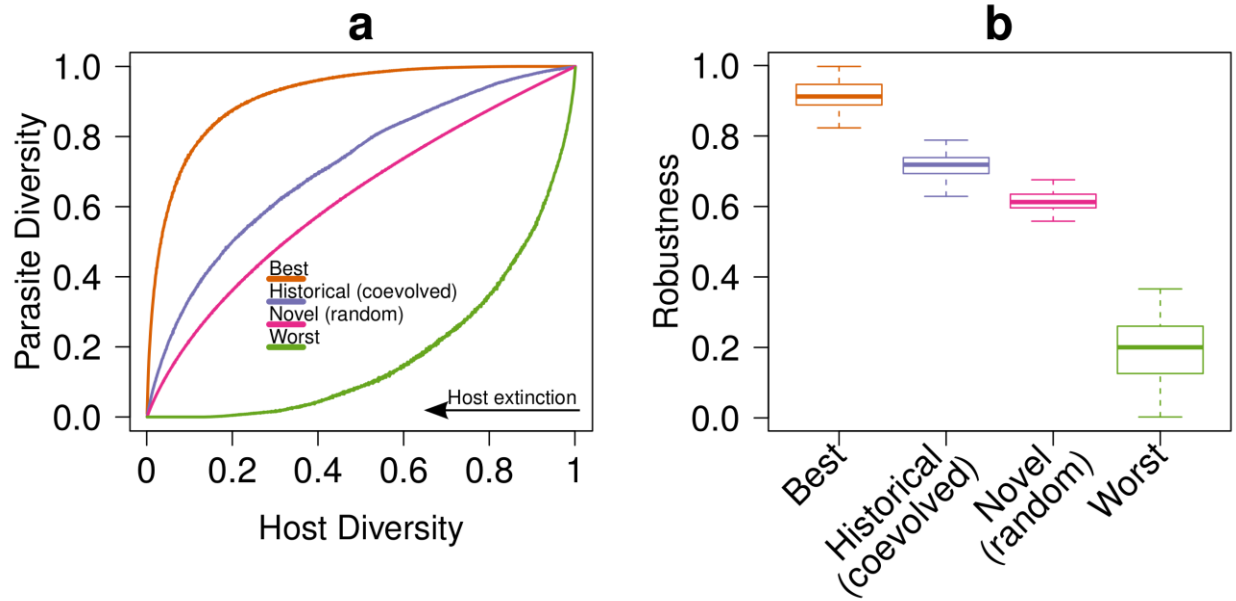

**Supplementary Figure 4 | Results of host-removal experiments in digital networks obtained by using organisms' genotypes as taxonomic units (instead of tasks). a)**

Average fraction of parasite species remaining in the digital host-parasite network after the subsequent removal of all host species according to historical conditions (from right to left) in all the experiments, contrasted with a best and a worst-case scenario, and a novel (random) scenario.

**b)** Robustness (the areas under curves in the four host removal scenarios) of the digital host-parasite networks under different scenarios of host removal. Boxes indicate first and third quartiles, whiskers indicate range values, and horizontal lines indicate median values.

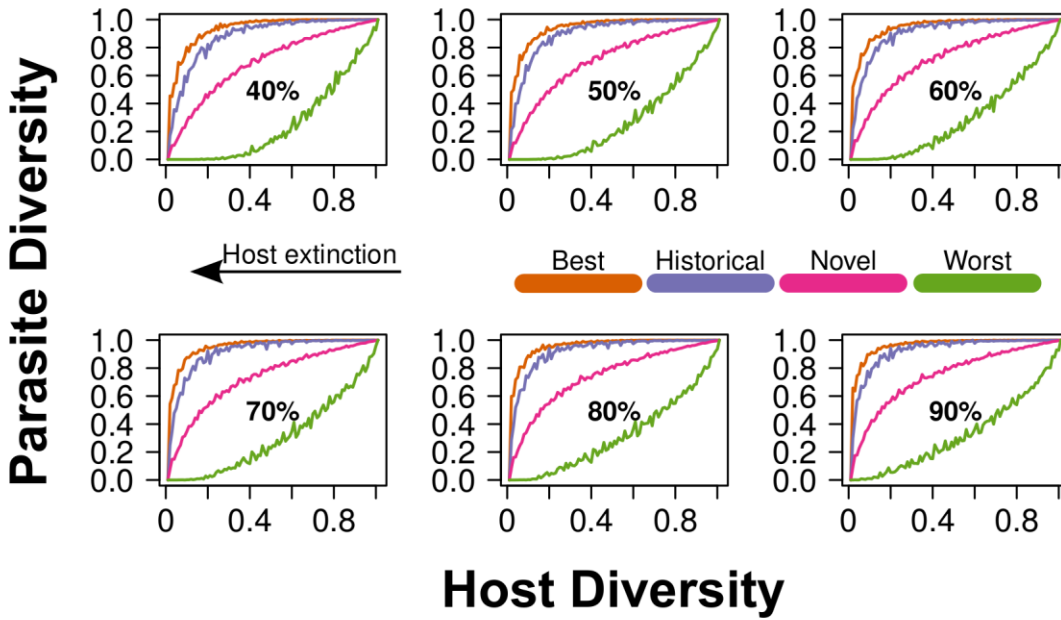

**Supplementary Figure 5 | Disassembling partial networks.** Average fraction of parasite species remaining in partial networks including random samples of 40%, 50%, 60%, 70%, 80% and 90% of the original edges after the subsequent removal of all host species according to the actual order of extinction observed in all experiments (historical), contrasted with a best-case and a worst-case scenario, and a novel (random) scenario.

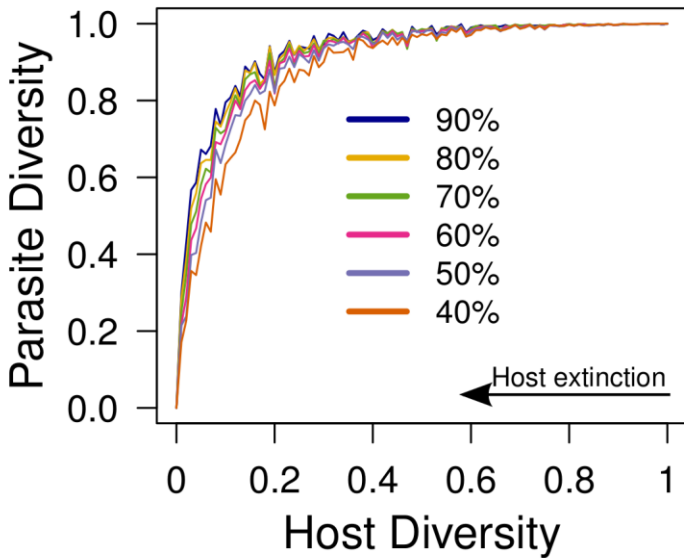

**Supplementary Figure 6 | Comparison between historical disassembly in partial networks of increasing size.** Average fraction of parasite species remaining in partial networks including random samples of 40%, 50%, 60%, 70%, 80% and 90% of the original edges after the subsequent removal of all host species according to the actual order of extinction (i.e., historical) observed in all experiments.

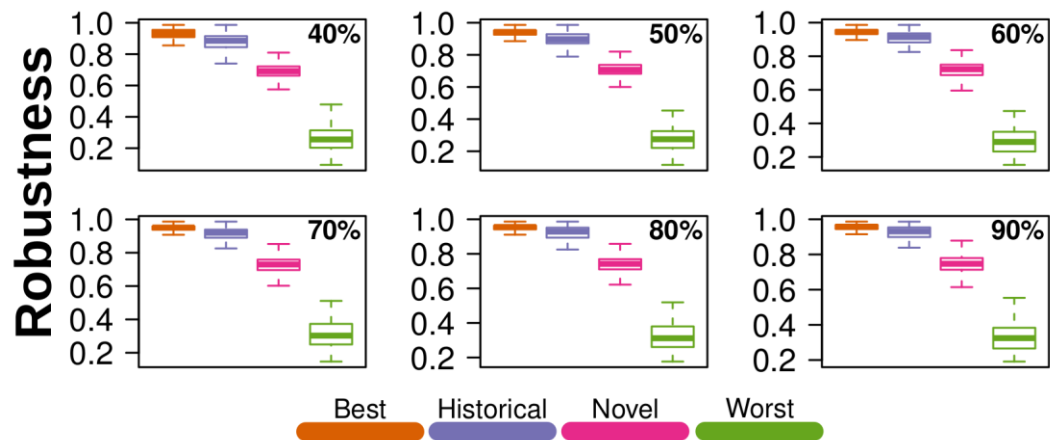

**Supplementary Figure 7 | Parasite assemblage robustness in partial networks.** Boxplots of the robustness obtained in partial networks including random samples of 50%, 60%, 70%, 80% and 90% of the original edges resulting from the subsequent removal of all host species according to the actual order of extinction observed in all experiments, contrasted with a best and a worst case scenario, and a novel (random) scenario. Boxes indicate first and third quartiles, whiskers indicate range values, and horizontal lines indicate median values.

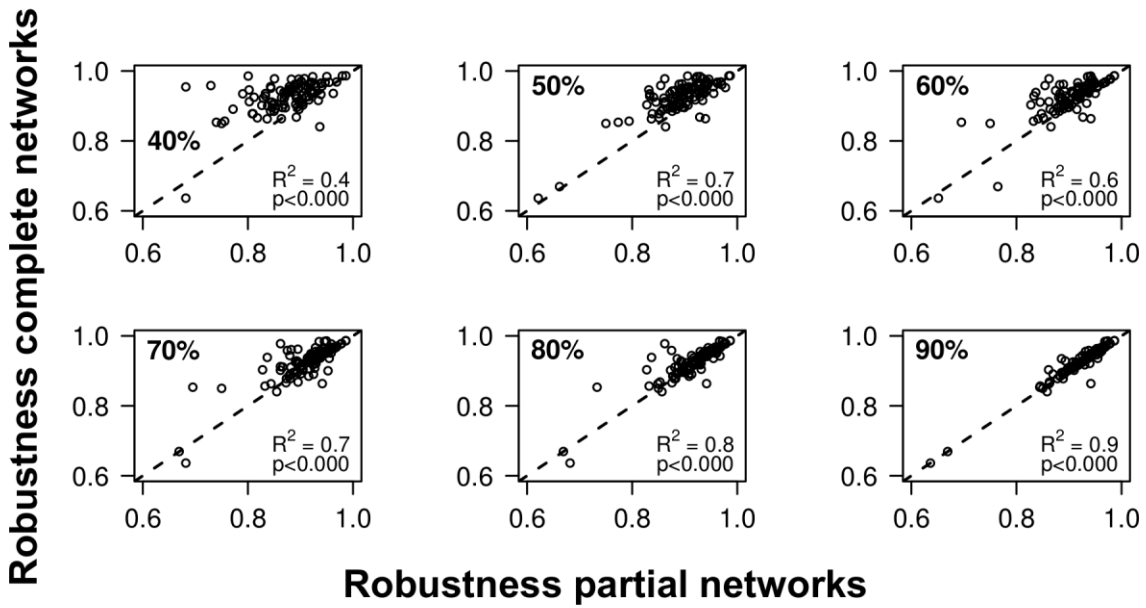

**Supplementary Figure 8 | Comparison between parasite assemblage robustness in complete and partial networks.** Relationships between the robustness resulting from disassembling the complete digital host-parasite networks according to the observed extinction risks and the corresponding robustness values obtained from partial networks including random samples of 40%, 50%, 60%, 70%, 80% and 90% of the original edges.



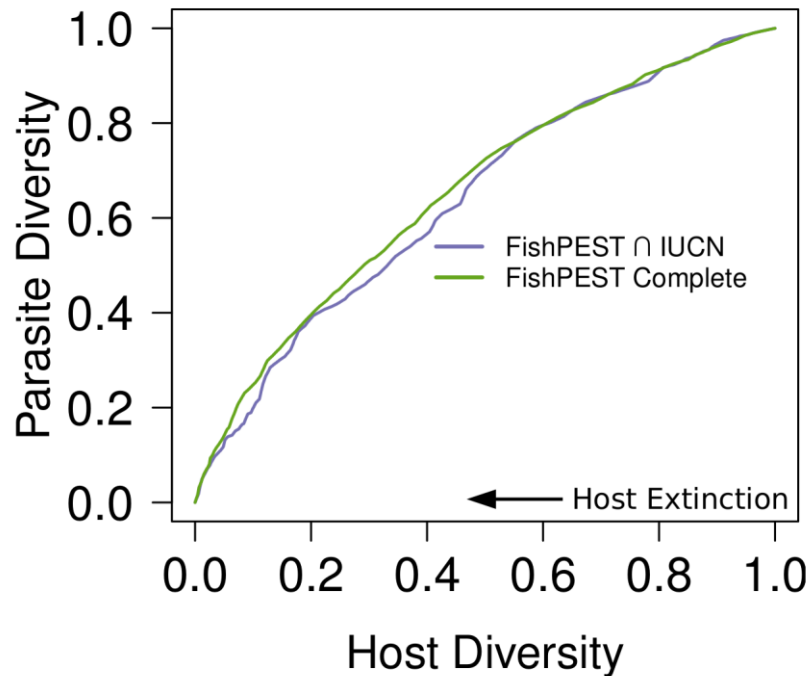

**Supplementary Figure 9 | Effect of data availability on the estimation of global fish parasite assemblage robustness under historical conditions.** Comparison between the historical robustness of the network based on the entire FishPEST database<sup>13</sup> and that of the same network filtered by excluding all host species not listed in IUCN red list, both disassembled according to intrinsic vulnerability values<sup>15</sup>. Disassembly was replicated 100 times randomizing the order of ties, and the results were averaged.

## Supplementary Tables

**Supplementary Table 1:** Environmental parameters in the Avida simulations, and the resulting properties of communities and host-parasite networks at the end of the co-evolutionary phase.

*Net resource availability* is the overall balance between in-flowing and out-flowing resource units per simulation step. *Carrying capacity* is the maximum possible number of simultaneously alive individuals, that is equal to the number of cells (which, in turn, is given by  $World\ width \times World\ height$ ). *Node Overlap/Segregation* and *Modularity* were computed according to the procedure described in Strona and Veech<sup>36</sup>. *Host/parasite interactions* corresponds to the number of links in the host/parasite networks.

|                                                | Min.   | 1st Qu. | Median | Mean   | 3rd Qu. | Max.   | St. Dev. |
|------------------------------------------------|--------|---------|--------|--------|---------|--------|----------|
| <i>Maturity (number of steps)</i>              | 101000 | 175500  | 259500 | 264200 | 334250  | 491000 | 104609   |
| <i>Number of resources</i>                     | 1.00   | 4.00    | 5.00   | 4.74   | 6.00    | 8.00   | 1.78     |
| <i>Net resource availability</i>               | 21.4   | 54.5    | 66.9   | 72.2   | 81.2    | 166.0  | 28.8     |
| <i>World width</i>                             | 50.0   | 65.0    | 83.0   | 83.8   | 104.0   | 119.0  | 22.0     |
| <i>World height</i>                            | 50.0   | 67.8    | 84.0   | 84.3   | 103.3   | 119.0  | 20.6     |
| <i>Carrying capacity</i>                       | 2862   | 5118    | 6671   | 7007   | 8270    | 13216  | 2390     |
| <i>Node Overlap/Segregation</i>                | -0.04  | 0.40    | 0.53   | 0.54   | 0.68    | 1.00   | 0.22     |
| <i>Modularity</i>                              | 0.00   | 0.59    | 0.66   | 0.62   | 0.74    | 0.85   | 0.20     |
| <i>Number of host phenotypes</i>               | 1.0    | 15.0    | 21.0   | 23.1   | 27.3    | 65.0   | 11.6     |
| <i>Number of parasite phenotypes</i>           | 2.0    | 7.8     | 14.0   | 21.6   | 31.0    | 80.0   | 19.3     |
| <i>Host/parasite interactions (phenotypes)</i> | 3      | 42      | 88     | 133    | 179     | 670    | 128      |
| <i>Number of host genotypes</i>                | 843    | 1534    | 2025   | 2211   | 2730    | 5463   | 934      |
| <i>Number of parasite genotypes</i>            | 58     | 398     | 712    | 872    | 1126    | 3472   | 640      |
| <i>Number of host individuals</i>              | 2575   | 3961    | 5388   | 5666   | 6924    | 13018  | 2201     |
| <i>Number of parasite individuals</i>          | 140    | 1317    | 2566   | 2790   | 3626    | 8968   | 1891     |

**Supplementary Table 2:** Relationships (expressed as Spearman’s rank correlation coefficients) between the robustness of the digital host parasite networks obtained at the end of the co-evolutionary experiments, and the environmental features where the networks emerged (in terms of world dimensions and resource diversity/availability), network structural properties (node overlap/segregation, modularity, number of nodes, i.e. host and parasite phenotypes, and links, i.e. host/parasite interactions), genotypic and phenotypic diversity, and overall density of host and parasite individuals.

|                                                                   | <b>Robustness</b> |              |             |              |
|-------------------------------------------------------------------|-------------------|--------------|-------------|--------------|
|                                                                   | <i>Historical</i> | <i>Novel</i> | <i>Best</i> | <i>Worst</i> |
| <i>Maturity (steps)</i>                                           | 0.05              | -0.06        | 0.04        | 0.05         |
| <i>Resources</i>                                                  | -0.14             | 0.05         | -0.12       | 0.02         |
| <i>Net resource availability</i>                                  | 0.06              | -0.08        | -0.04       | -0.05        |
| <i>World width</i>                                                | 0.07              | -0.05        | 0.20        | -0.32        |
| <i>World height</i>                                               | -0.08             | 0.27         | 0.00        | 0.18         |
| <i>Carrying capacity</i>                                          | -0.07             | 0.14         | 0.08        | -0.12        |
| <i>Node Overlap/Segregation (raw value, <math>\hat{N}</math>)</i> | 0.25              | -0.13        | 0.26        | -0.12        |
| <i>Node Overlap/Segregation (effect size, <math>Z_N</math>)</i>   | 0.13              | -0.18        | 0.10        | -0.10        |
| <i>Modularity</i>                                                 | -0.27             | -0.05        | -0.31       | 0.01         |
| <i>Number of host phenotypes</i>                                  | 0.06              | 0.16         | 0.16        | 0.11         |
| <i>Number of parasite phenotypes</i>                              | -0.05             | 0.18         | 0.03        | 0.01         |
| <i>Host/parasite interactions (phenotypes)</i>                    | -0.01             | 0.31         | 0.08        | 0.15         |
| <i>Number of host genotypes</i>                                   | 0.01              | -0.06        | 0.08        | -0.36        |
| <i>Number of parasite genotypes</i>                               | 0.03              | 0.13         | 0.03        | 0.14         |
| <i>Number of host individuals</i>                                 | -0.01             | -0.02        | 0.08        | -0.32        |
| <i>Number of parasite individuals</i>                             | 0.05              | -0.04        | 0.00        | 0.14         |
